# Supplementary material
Source: publisher figshare collection journal article supplement (https://plos.figshare.com/ndownloader/files/21526593)
Supplement: Supplementary file [file 21526593]

## S1 Appendix

### Analysis of the extended drift-diffusion model

In the extended drift-diffusion model (eDDM) developed in [1], the dynamics of evidence accumulation can be described by:

$$dx = dt(kc + \mu_0) + \sqrt{dt}\sigma \quad (1)$$

where:

$x$ : Dynamical (decision) variable.

$c$ : Coherence level.

$k, \mu_0$ : Free parameters that control the speed-accuracy trade-off

$\sigma$ : A random variable sampled from a normal distribution, i.e.  $\sigma \sim \mathcal{N}(0, 1)$ .

In the eDDM, the initial decision and decision time are determined by the threshold  $B$  (or  $-B$ ). However, after the initial decision, evidence accumulation continues until threshold  $B_\Delta$  is reached for confirmation of the initial decision or a change-of-mind. In particular, the post-decision accumulation process is driven by late-incoming evidence (and noise fluctuations), with a change-of-mind deadline of around 300ms. eDDM has been previously used to fit response times (and choice accuracy) from change-of-mind trials in reaction-time tasks, in which stimulus offset and response onset coincided [1,2]. The eDDM suggested, consistent with the experimental data in such paradigms [1,3], that change-of-mind trials are most likely to occur during trials with faster response times.

To provide an insight into the eDDM predictions regarding change-of-mind behaviour in the context of the current study, we simulated the eDDM with the stimulus input  $kc + \mu_0$  set to 0 immediately after the initial decision (using other parameter values that are fitted to the data from Subject S in [1]). This setup mimics the situations where no additional evidence is available after the initial decisions. Because eDDM does not incorporate any additional assumptions about other processes potentially inducing changes-of-mind [1], the post-decision process in this setup is driven solely by noise fluctuations. Not surprisingly, we found that in this setup, eDDM does not account for the observed change-of-mind behaviour. Specifically, the majority of changes-of-mind in this case were correct-to-error changes, with increasing frequency of changes-of-mind with coherence level (Fig. A). Furthermore, the majority of change-of-mind trials at high coherence levels had fast initial response times (Fig. A).

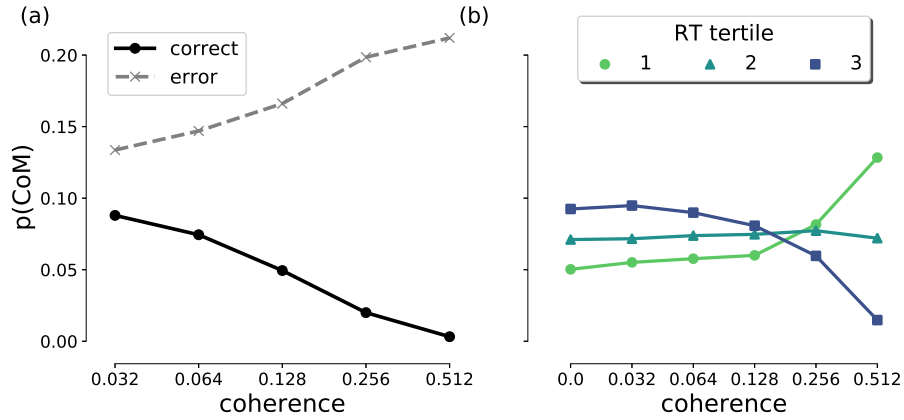

Fig. A: Results of simulating eDDM in the scenario of stimulus discontinued immediately after the initial decision. **(a)** When the post-initiation process is driven entirely by noise fluctuations, the majority of changes-of-mind are errors. **(b)** At high coherence levels (i.e.  $\geq 0.256$ ), the majority of changes-of-mind occur in trials with fast initial response times.

## Supplementary References

- [1] Resulaj A, Kiani R, Wolpert DM, Shadlen MN. Changes of mind in decision-making. *Nature*. 2009;461(7261):263–266. doi:10.1038/nature08275.
- [2] Van Den Berg R, Anandalingam K, Zylberberg A, Kiani R, Shadlen MN, Wolpert DM. A common mechanism underlies changes of mind about decisions and confidence. *eLife*. 2016;5:e12192.
- [3] Albantakis L, Branzi FM, Costa A, Deco G. A multiple-choice task with changes of mind. *PLoS ONE*. 2012;7(8). doi:10.1371/journal.pone.0043131.
